# Supplementary material for: Loss of MYO5B expression deregulates late endosome size which hinders mitotic spindle orientation
Source: PLoS Biol. 2019 Nov 4;17(11):e3000531. doi: 10.1371/journal.pbio.3000531 (PMC6855566; doi:10.1371/journal.pbio.3000531)
Supplement: S2 Data — (XLSX) [file pbio.3000531.s020.xlsx]

## Sheet: panel A
Caco-2 WT	Caco-2 MYO5B-/-
0.7	3.1
1.6	5.8
1	4.5

## Sheet: panel C
Caco-2 WT				Caco-2 MYO5B-/-				Average
n=1	n=2	n=3		n=1	n=2	n=3		Caco-2 WT	Caco-2 MYO5B-/-
16	15	150		136	120	120		48	108
24	120	15		24	168	120		55	98
56	60	15		104	152	15		43	84
8	15	45		80	120	90
24	75	30		120	152	60
56	15	15		112	144	90
128	45	30		88	64	30
15	72	60		176	168	90
90	152	15		128	136	120
15	104	30		136	128	75
0	168	60		112	32	45
96	15	15		136	24	30
80	105	30		112	112	90
104	30	15		120	168	120
112	15	30		96	128	30
24	15	60		104	168	60
16	0	90		48	90	45
56	15	90		176	120	90
8	30	15		72	90	150
64	30	45		184	15	90
32				144	30	60
24				90	30	270
				60	15	210
				30	90	180
				60	15	150
				150	120	180
				90	45	15
				150	15	15
				180	150	30
				120	15	120
				30	150	30
				90	120	30
					60	30
					90	30
					180	60
						60
